# Supplementary material for: Abnormal Levels of Metal Micronutrients and Autism Spectrum Disorder: A Perspective Review
Source: PubMed Central journal article supplement (PMC7759187; doi:10.3389/fnmol.2020.586209), 2020-12-10
Supplement: Table_1.pdf [file Table_1.pdf]

**Supplementary Table S1:** Neurodevelopmental processes likely indicated in ASD etiology for which zinc plays a role in. Genes associated with ASD were extracted from SFARI Gene (<https://gene.sfari.org/>) on March 4th, 2020. Genes were then inputted into UniProt's Retrieve/ID mapping tool to obtain UniProtKB identifiers. With UniProtKB identifiers, genes were then filtered for zinc finger motifs. The remaining 125 genes were inputted into a Gene Ontology analysis for biological processes with the GO Ontology database Released 2020-02-2, using a PANTHER Overrepresentation Test (significant p value of 0.05). Full gene list used in analysis is found in Supplementary Table 2.

| Neurodevelopmental GO Terms                                                                                                                     | Number of zinc-binding ASD Genes upregulated in process (N =125) | Fold enrichment | Raw p-value | Sources (Pubmed ID) |
|-------------------------------------------------------------------------------------------------------------------------------------------------|------------------------------------------------------------------|-----------------|-------------|---------------------|
| <b>Stem cell proliferation</b>                                                                                                                  |                                                                  |                 |             | 28770438            |
| positive regulation of epithelial cell proliferation (GO:0050679)                                                                               | 8                                                                | 7.19            | 2.10E-05    |                     |
| regulation of epithelial cell proliferation (GO:0050678)                                                                                        | 11                                                               | 5.7             | 4.93E-06    |                     |
| negative regulation of nervous system development (GO:0051961)                                                                                  | 8                                                                | 4.46            | 5.08E-04    |                     |
| positive regulation of nervous system development (GO:0051962)                                                                                  | 12                                                               | 3.79            | 9.31E-05    |                     |
| regulation of nervous system development (GO:0051960)                                                                                           | 19                                                               | 3.51            | 2.14E-06    |                     |
| negative regulation of cell differentiation (GO:0045596)                                                                                        | 14                                                               | 3.44            | 6.65E-05    |                     |
| regulation of cell differentiation (GO:0045595)                                                                                                 | 36                                                               | 3.42            | 3.26E-11    |                     |
| negative regulation of developmental process (GO:0051093)                                                                                       | 16                                                               | 2.91            | 1.36E-04    |                     |
| positive regulation of developmental process (GO:0051094)                                                                                       | 23                                                               | 2.9             | 3.84E-06    |                     |
| regulation of developmental process (GO:0050793)                                                                                                | 42                                                               | 2.8             | 2.33E-10    |                     |
| nervous system development (GO:0007399)                                                                                                         | 37                                                               | 2.72            | 8.97E-09    |                     |
| cell differentiation (GO:0030154)                                                                                                               | 42                                                               | 1.97            | 6.18E-06    |                     |
| developmental process (GO:0032502)                                                                                                              | 66                                                               | 1.96            | 6.37E-10    |                     |
| <b>Cell fate specification</b>                                                                                                                  |                                                                  |                 |             | 28770438            |
| positive regulation of neuron projection development (GO:0010976)                                                                               | 10                                                               | 5.98            | 9.08E-06    |                     |
| positive regulation of neuron differentiation (GO:0045666)                                                                                      | 12                                                               | 5.5             | 2.55E-06    |                     |
| regulation of neuron differentiation (GO:0045664)                                                                                               | 17                                                               | 4.45            | 3.43E-07    |                     |
| negative regulation of neurogenesis (GO:0050768)                                                                                                | 8                                                                | 4.8             | 3.18E-04    |                     |
| positive regulation of neurogenesis (GO:0050769)                                                                                                | 12                                                               | 4.32            | 2.73E-05    |                     |
| regulation of neurogenesis (GO:0050767)                                                                                                         | 19                                                               | 3.97            | 3.52E-07    |                     |
| generation of neurons (GO:0048699)                                                                                                              | 26                                                               | 2.92            | 7.11E-07    |                     |
| neurogenesis (GO:0022008)                                                                                                                       | 26                                                               | 2.74            | 2.31E-06    |                     |
| <b>Neuronal migration</b>                                                                                                                       |                                                                  |                 |             | 3897914             |
| Positive regulation of endothelial cell chemotaxis by VEGF-activated vascular endothelial growth factor receptor signaling pathway (GO:0038033) | 2                                                                | 70.09           | 6.58E-04    |                     |
| regulation of neuron projection development (GO:0010975)                                                                                        | 14                                                               | 4.76            | 1.86E-06    |                     |
| <b>Synaptic genesis/plasticity</b>                                                                                                              |                                                                  |                 |             | 3897914             |
| Regulation of dendrite extension (GO:1903859)                                                                                                   | 4                                                                | 28.03           | 2.10E-05    |                     |
| positive regulation of dendrite extension (GO:1903861)                                                                                          | 3                                                                | 22.85           | 4.21E-04    |                     |
| <b>Neurotransmitter release</b>                                                                                                                 |                                                                  |                 |             |                     |
| calcium ion-regulated exocytosis of neurotransmitter (GO:0048791)                                                                               | 3                                                                | 23.89           | 3.74E-04    |                     |
| regulation of neurotransmitter secretion (GO:0046928)                                                                                           | 5                                                                | 7.96            | 5.05E-04    |                     |
