# Supplementary material for: Abnormal Levels of Metal Micronutrients and Autism Spectrum Disorder: A Perspective Review
Source: PubMed Central journal article supplement (PMC7759187; doi:10.3389/fnmol.2020.586209), 2020-12-10
Supplement: Table_3.pdf [file Table_3.pdf]

**Supplementary Table S3.** Clinical reference ranges for selenium, copper, and zinc used in the United States.

| <b>Age</b>           | <b>Selenium</b><br>ng/mL | <b>Copper</b><br>mcg/mL | <b>Zinc</b><br>mcg/mL |
|----------------------|--------------------------|-------------------------|-----------------------|
| 0 – 2 Months         | 45-90                    | 0.40-1.40               | 0.60-1.20             |
| 3 – 6 Months         | 50-120                   | 0.40-1.60               | 0.60-1.20             |
| 7 – 9 Months         | 60-120                   | 0.40-1.70               | 0.60-1.20             |
| 10 – 12 Months       | 70-130                   | 0.80-1.70               | 0.60-1.20             |
| 13 Months – 10 Years | 70-150                   | 0.80-1.80               | 0.60-1.20             |
| > 11 Years           | 70-150                   | 0.75-1.45               | 0.66-1.10             |
